# Supplementary material
Source: MDPI journal article supplement (https://www.mdpi.com/2311-5637/8/2/85)
Supplement: s1 [file s1]

**Table S1.** The concentration levels of essential macro- and microelements in wines and beverages (in mg/L) (sample code as in Table 1).

| Sample            | Macro-elements |               | Micro-elements |           |           |           |
|-------------------|----------------|---------------|----------------|-----------|-----------|-----------|
|                   | Na             | K             | Fe             | Cu        | Zn        | B         |
| PW <sup>a</sup>   | 72.8           | 1603.2        | 1.4            | 0.1       | 0.7       | 10.8      |
| SW <sup>a</sup>   | 1331.4         | 1674.5        | 1.6            | 0.1       | 0.0       | 11.6      |
| StW <sup>a</sup>  | 76.2           | 1252.0        | 1.7            | 0.2       | 0.1       | 10.0      |
| WW <sup>a</sup>   | 41.7           | 1354.9        | 1.8            | 0.1       | 0.3       | 12.0      |
| CW <sup>a</sup>   | 35.6           | 1943.4        | 1.3            | 0.3       | 0.5       | 13.5      |
| CWC <sup>a</sup>  | 36.7           | 2210.6        | 1.8            | 0.5       | 0.7       | 15.1      |
| PSW <sup>b</sup>  | 1406.7 ± 31.9  | 1220.1 ± 28.7 | 0.7 ± 0.0      | 0.4 ± 0.1 | 0.8 ± 0.1 | 8.6 ± 0.1 |
| PWW <sup>b</sup>  | 53.0 ± 3.3     | 947.7 ± 1.8   | 0.6 ± 0.0      | 0.6 ± 0.1 | 1.7 ± 0.2 | 9.4 ± 0.2 |
| PStW <sup>b</sup> | 56.2 ± 10.0    | 841.4 ± 0.2   | 0.5 ± 0.0      | 0.8 ± 0.1 | 0.8 ± 0.1 | 6.6 ± 0.1 |
| PCW <sup>b</sup>  | 36.0 ± 1.6     | 1015.7 ± 36.9 | 0.7 ± 0.0      | 0.4 ± 0.0 | 1.0 ± 0.0 | 7.6 ± 0.2 |

<sup>a</sup> Sample obtained by pooling the two replicates.

<sup>b</sup> Average and standard deviation of duplicate samples.
